# Supplementary material for: A green fluorescence turn-off system for meclofenoxate determination by Cilefa Pink B dye
Source: Royal Society of Chemistry journal article supplement (doi:10.1039/d2ra05128a), 2022-01-01
Supplement: d2ra05128a1.pdf [file d2ra05128a1.pdf]

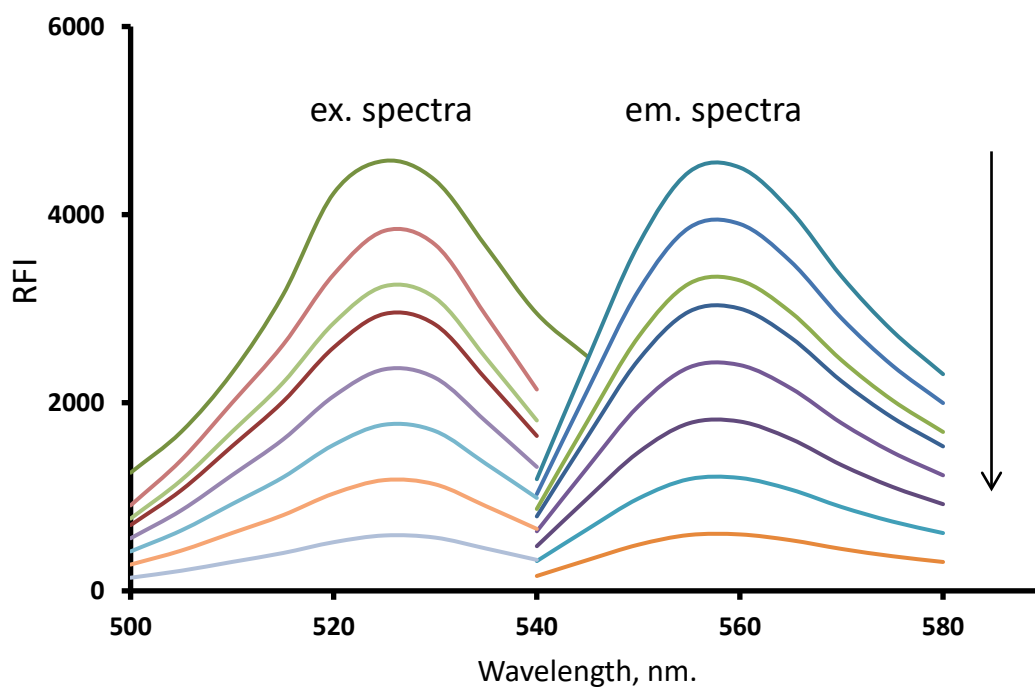

**SI 1:** The quantitative experiment spectra for the fluorescent spectra at different concentrations of the investigated drug.

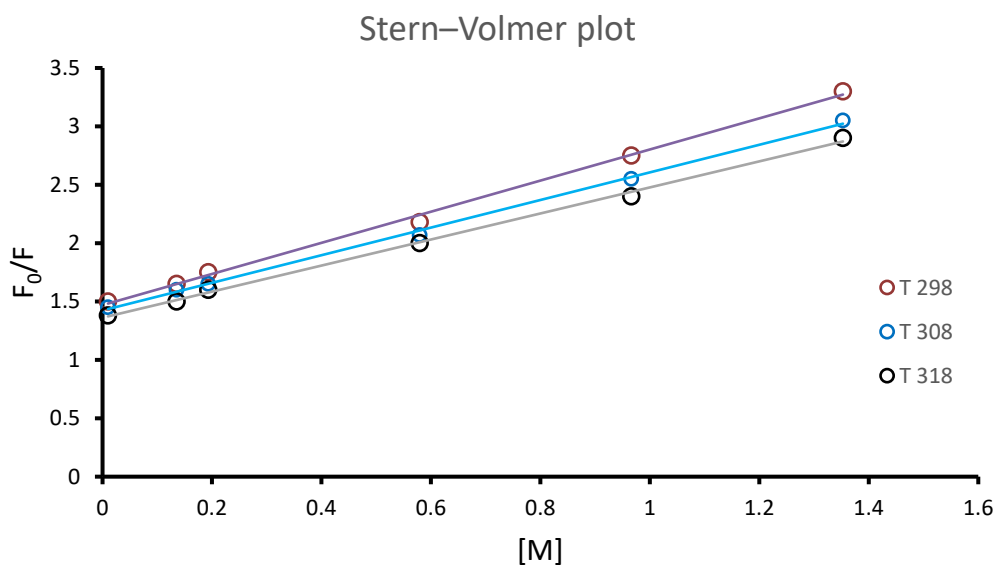

**SI 2:** MFX-induced CPB quenching depicted in the Stern–Volmer graph at three temperature levels.

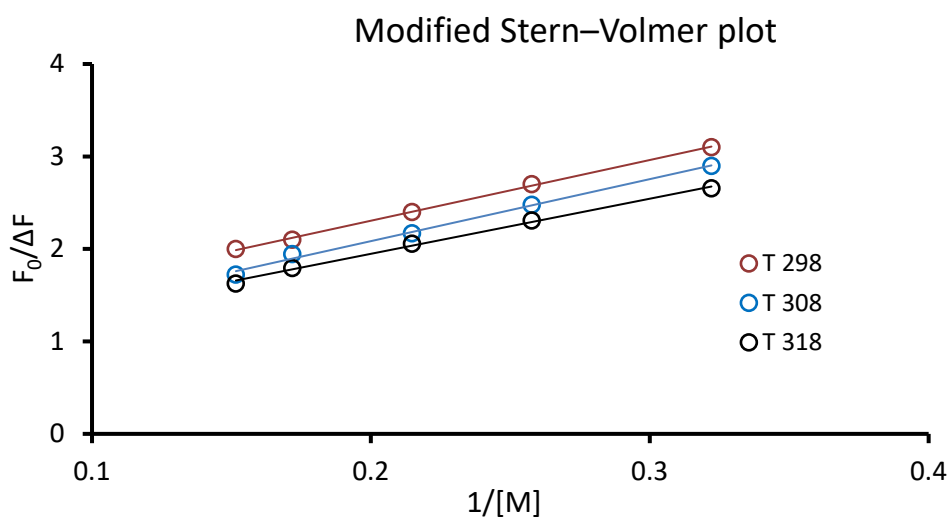

**SI 3:** The Modified Stern–Volmer charting for the MFX and CPB stain binding.

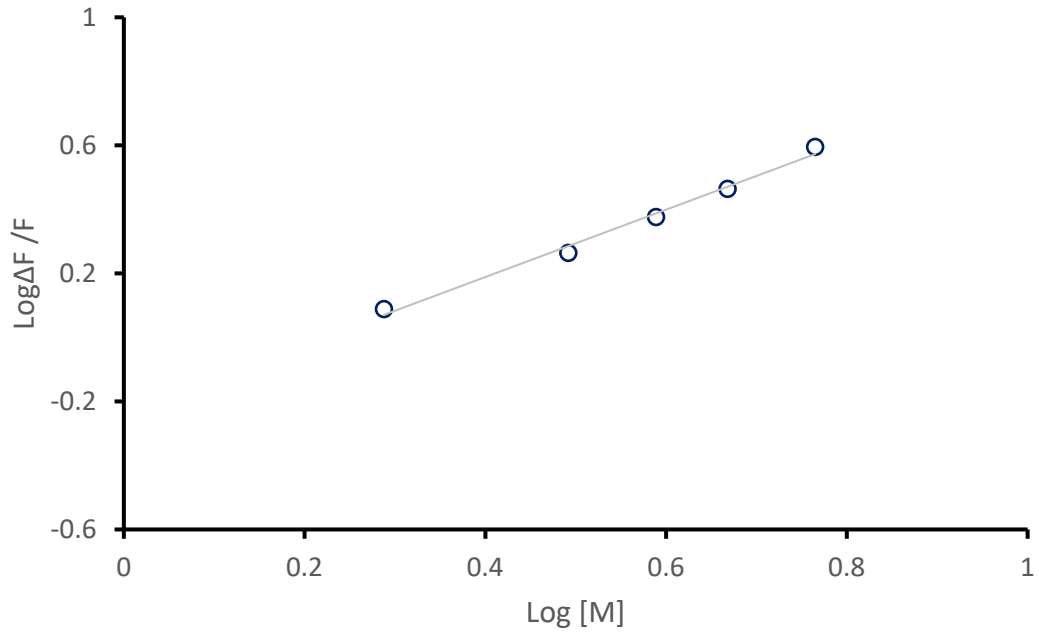

**SI 4:** The charting of  $\log \Delta F/F$  to  $\log [M]$  at operating temperature to determine the binding site(s).

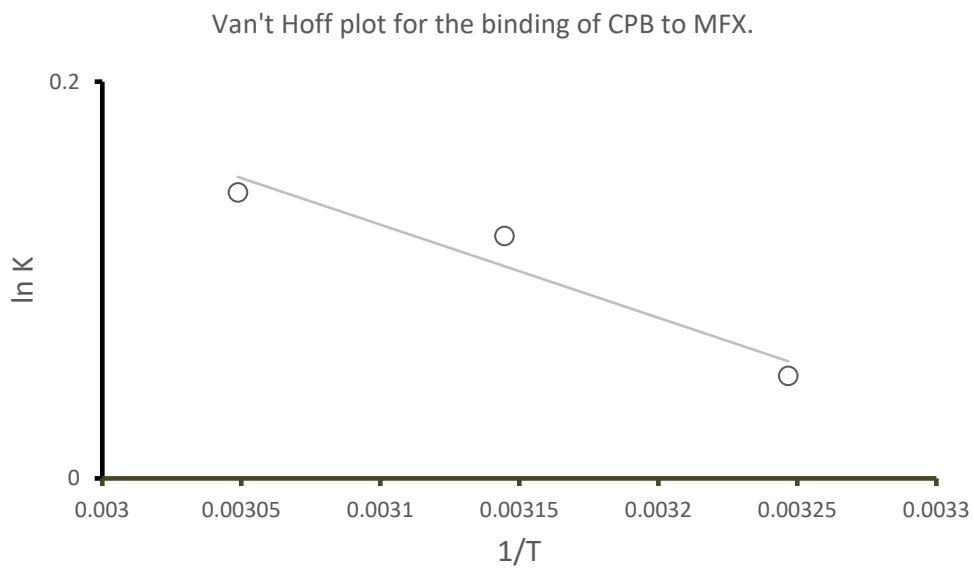

**SI 5:** Van't Hoff charting for the thermodynamic criteria

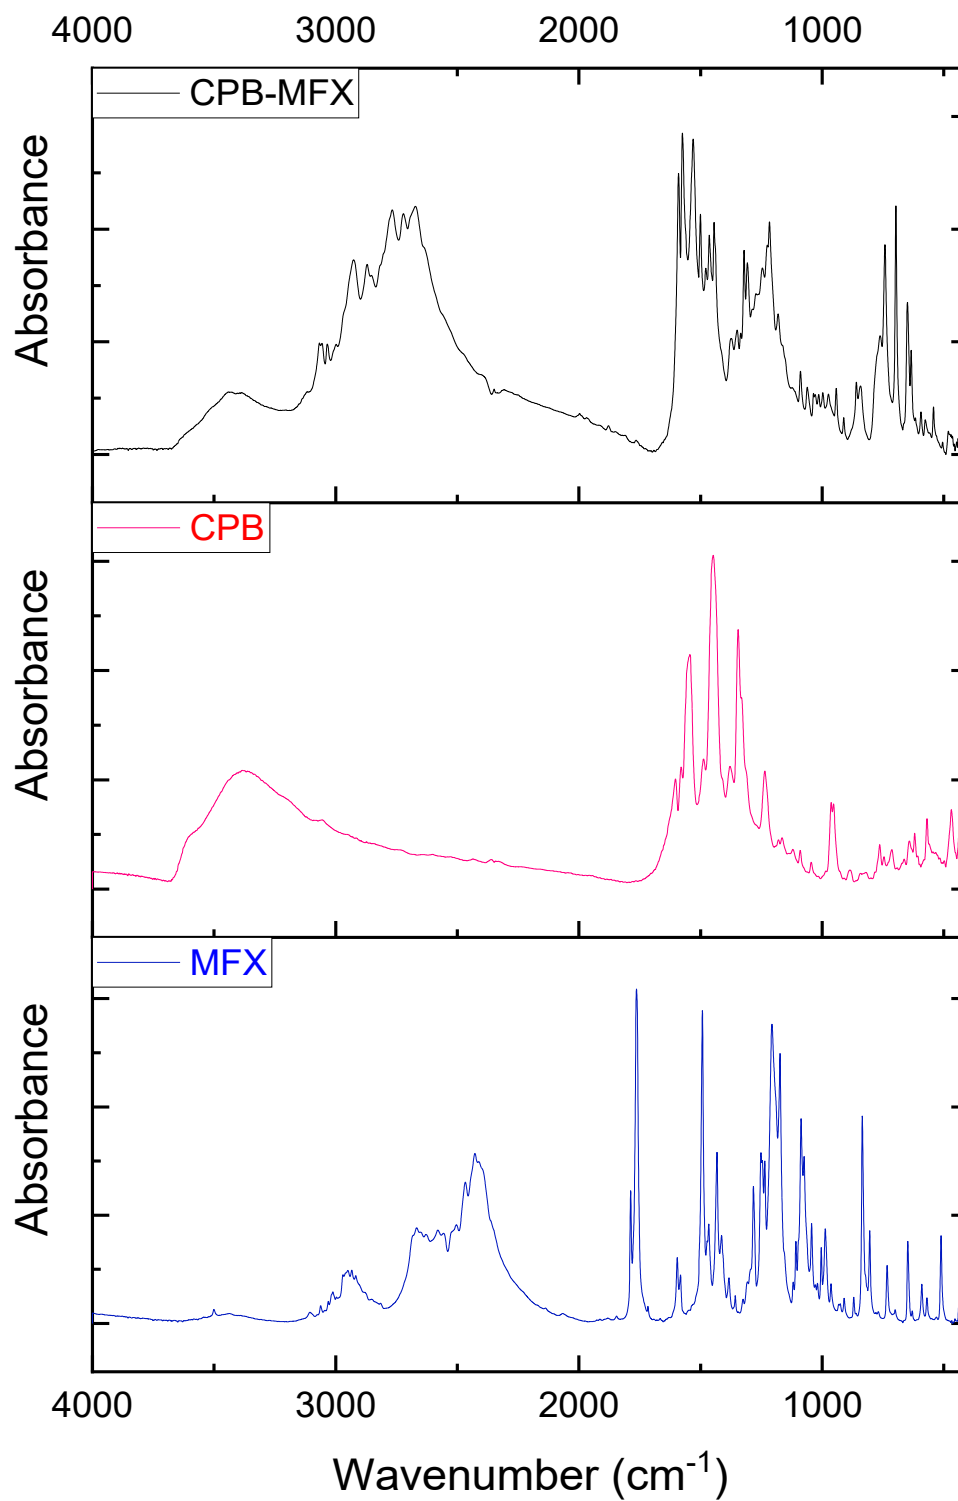

SI 6: FTIR spectra of the drug, dye, and newly formed product.

**SI 7:** A list of equations.

| The equation                                                                           | Equ. No. |
|----------------------------------------------------------------------------------------|----------|
| $f_0/f = 1 + k_{sv}[M] = 1 + k_q\tau_o [M]$                                            | (1)      |
| $k_q = k_{sv}/\tau_o$                                                                  | (2)      |
| $f_0/\Delta f = \left[ \frac{1}{f_a K_a} \right] \left[ \frac{1}{[M]} \right] + 1/f_a$ | (3)      |
| $\log \frac{(f_0-f)}{f} = \log k_d + n \log [M]$                                       | (4)      |
| $\ln K_T = -\Delta H/RT + \Delta S/R$                                                  | (5)      |
| $\Delta G^\circ = \Delta H^\circ - T \Delta S^\circ$                                   | (6)      |

$F_0 / F$ : The relative fluorescence amplitudes of the dye and analyte-dye.

$K_{SV}$ : Volmer dynamic suppressing constant.

$k_q$ : The bimolecular suppressing rate constant.

$[M]$ : the analyte molar concentration.

$K_a$ : The suppression constant.

$F_a$ : The initial fluorescence that can be quenched by the quencher.

$\Delta F$ : The fluorescence difference.

$n$ : The number of linking sites.

$R$ : The gas constant,  $K_T$  is the coupling constant, and  $T$  is the temperature (in kelvin scale).

$\Delta G$ : free energy,  $\Delta S$ , entropy changes, and  $\Delta H$  is enthalpy change.
